# Supplementary material for: Impacts of the COVID-19 Pandemic on Women and Early Career Archaeologists
Source: MDPI journal article supplement (doi:10.3390/heritage4030093), 2021-08-10
Supplement: s1 [file s1]

**Table S1.** Contingency table for x2 analysis on gender and job loss.

| Results                                    |          |             |  |  |  |                   |
|--------------------------------------------|----------|-------------|--|--|--|-------------------|
|                                            | Job Loss | No Job Loss |  |  |  | Row Totals        |
| Women                                      |          |             |  |  |  |                   |
| Observed                                   | 56       | 273         |  |  |  | 329               |
| Expected                                   | 43.24    | 285.76      |  |  |  |                   |
| Men                                        |          |             |  |  |  |                   |
| Observed                                   | 17       | 209         |  |  |  | 226               |
| Expected                                   | 29.71    | 196.29      |  |  |  |                   |
| Gender fluid/<br>Agender / Other<br>gender |          |             |  |  |  |                   |
| Observed                                   | 1        | 7           |  |  |  | 8                 |
| Expected                                   | 1.05     | 6.95        |  |  |  |                   |
|                                            |          |             |  |  |  |                   |
|                                            |          |             |  |  |  |                   |
| Column Totals                              | 74       | 489         |  |  |  | 563 (Grand Total) |

**Table S2.** Contingency table for x2 analysis on age group and job loss.

| Results       |          |             |  |  |  |                   |
|---------------|----------|-------------|--|--|--|-------------------|
|               | Job Loss | No Job Loss |  |  |  | Row Totals        |
| 18-34         |          |             |  |  |  |                   |
| Observed      | 36       | 170         |  |  |  | 206               |
| Expected      | 26.74    | 179.26      |  |  |  |                   |
| 35-54         |          |             |  |  |  |                   |
| Observed      | 34       | 234         |  |  |  | 268               |
| Expected      | 34.79    | 233.21      |  |  |  |                   |
| 55+           |          |             |  |  |  |                   |
| Observed      | 4        | 92          |  |  |  | 96                |
| Expected      | 12.46    | 83.54       |  |  |  |                   |
|               |          |             |  |  |  |                   |
|               |          |             |  |  |  |                   |
| Column Totals | 74       | 496         |  |  |  | 570 (Grand Total) |

**Table S3.** Contingency table for x2 analysis on ethnicity and job loss.

| Results           |          |             |  |  |  |                   |
|-------------------|----------|-------------|--|--|--|-------------------|
|                   | Job Loss | No Job Loss |  |  |  | Row Totals        |
| Caucasian/White   |          |             |  |  |  |                   |
| Observed          | 60       | 422         |  |  |  | 482               |
| Expected          | 61       | 421         |  |  |  |                   |
| Under-represented |          |             |  |  |  |                   |
| Observed          | 11       | 68          |  |  |  | 79                |
| Expected          | 10       | 69          |  |  |  |                   |
|                   |          |             |  |  |  |                   |
|                   |          |             |  |  |  |                   |
| Column Totals     | 71       | 490         |  |  |  | 561 (Grand Total) |
